# Supplementary figures and images for: Classifying Breast Cancer Subtypes Using Multiple Kernel Learning Based on Omics Data
Source: MDPI journal article supplement (doi:10.3390/genes10030200), 2019-03-07

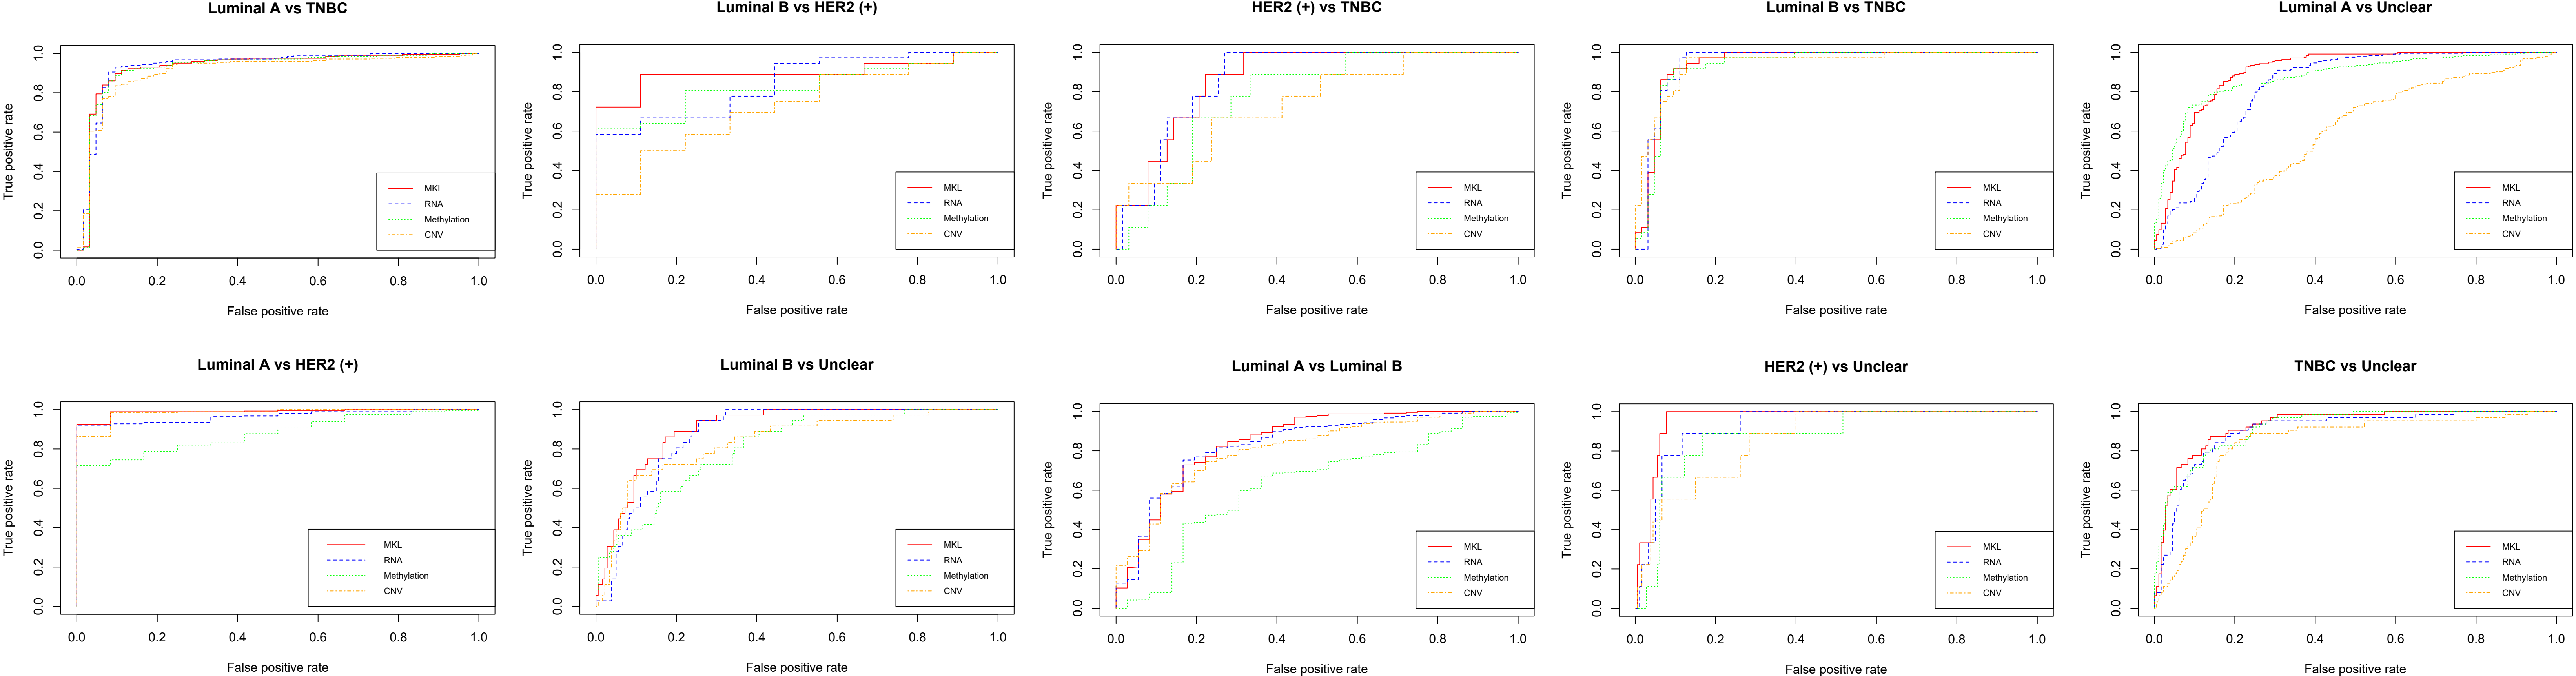

Supplement: s1 [file s1]
